# Supplementary material for: Reconstruction of the ZIF-67 structure and boosted hydrogen evolution reaction in an alkaline medium
Source: Royal Society of Chemistry journal article supplement (doi:10.1039/d3ta03214k), 2023-01-01
Supplement: d3ta03214k1.pdf [file d3ta03214k1.pdf]

## Supporting Information

# Reconstruction of ZIF-67 Structure and Boosted Hydrogen Evolution Reaction in Alkaline Medium

*Hanghang Guo<sup>a</sup>, Aibing Chen<sup>a,\*</sup>, Wanliang Mi<sup>c</sup>, Suojiang Zhang<sup>b</sup>, Yajuan Zhang<sup>b</sup>,*

*Xingwei Shi<sup>b,\*</sup>*

<sup>a</sup> College of Chemical and Pharmaceutical Engineering, Hebei University of Science and Technology, 26 Yuxiang Street, Shijiazhuang, 050018, China. E-mail:

chen\_ab@163.com

<sup>b</sup> Institute of Process Engineering, Chinese Academy of Sciences, Beijing, 100190, China. E-mail: xwshi@ipe.ac.cn

<sup>c</sup> State Key Laboratory of Catalytic Materials and Reaction Engineering (RIPP, SINOPEC)

## Experimental section

### 1. Materials

Cobalt nitrate hexahydrate ( $\text{Co}(\text{NO}_3)_2 \cdot 6\text{H}_2\text{O}$ , AR), hydrochloric acid (HCl, AR), acetone ( $\text{CH}_3\text{COCH}_3$ , AR) and potassium hydroxide (KOH, AR) were purchased from Sinopharm Chemical Reagent Co., Ltd. Cobalt sulfate heptahydrate ( $\text{CoSO}_4 \cdot 7\text{H}_2\text{O}$ , AR,  $\geq 99\%$ ), sodium succinate ( $\text{C}_4\text{H}_4\text{Na}_2\text{O}_4$ , AR, 99%) and dimethylamine borane (DMAB,  $\text{Et}_2\text{NHBH}_3$ , 96%) were purchased from Aladdin. 2-Methylimidazole ( $\text{C}_4\text{H}_6\text{N}_2$ , 98%), Pt-C (20% Pt), sodium sulfate anhydrous ( $\text{Na}_2\text{SO}_4$ , AR, 99%) and sodium hypophosphite monohydrate ( $\text{NaH}_2\text{PO}_2 \cdot \text{H}_2\text{O}$ , AR) were

purchased from Shanghai Macklin Biochemical Technology Co., Ltd. Anhydrous methanol was purchased from Tianjin Damao Chemical Reagent Factory. Ethanol ( $C_2H_6O$ , AR) was purchased from Xilong Chemical Co., Ltd. Ni foam (NF) was purchased from Changde Liyuan New Materials Co., Ltd. The water used in this experiment is deionized water. The chemicals used in an experiment or analysis were used in their as-received state, without undergoing any additional purification steps to remove impurities or enhance their purity.

## *2. Material synthesis*

The EP bath for the CoB catalyst was prepared by dissolving  $Na_2SO_4$  (1.5 g), sodium succinate (2.5 g) and  $CoSO_4$  (1.38 g) in 100 mL water followed by the addition of DMAB (0.72 g) into the solution. The EP bath for the CoP catalyst was prepared by dissolving  $Na_2SO_4$  (1.5 g), sodium succinate (2.5 g),  $NaH_2PO_2 \cdot H_2O$  (0.094 g) and  $CoSO_4$  (1.38 g) in 100 mL water.

Preparation of Pt-C/NF: 10 mg of 20 wt% Pt-C catalyst was added into 500  $\mu$ L water, 485  $\mu$ L ethanol and 15  $\mu$ L Nafion solution. Ultrasonic treatment made the catalyst disperse evenly. Then, 10  $\mu$ L of the mixture was dropped onto the nickel foam and dried under an ultraviolet lamp. The previous step was repeated until the catalyst load reached 9.4 mg  $cm^{-2}$ .

## *3. Structural characterization*

Field-emission scanning electron microscopy (FESEM) measurements were performed on a Gemini 300 field at an accelerating voltage of 2 kV. Transmission electron microscope (TEM) measurements were carried out on a JEM-F200

microscope (JEOL, Japan) operated at 200 kV. Energy dispersive X-ray spectrometer (EDX) is a technique used to obtain the elemental composition and distribution of a sample. In this case, EDX mapping was characterized by HAADF-STEM. X-ray diffraction (XRD) was performed on a Rigaku D/MAX 2550 diffractometer with Cu K $\alpha$  radiation ( $\lambda = 0.15406$  nm). The X-ray photoelectron spectra (XPS) of the products were recorded using a Thermo Scientific K-Alpha with an Al K $\alpha$  source. The Co, P, and B content of the materials were measured using the ICP-OES (Inductively Coupled Plasma Optical Emission Spectrometer) technique with an Agilent 5110 instrument.

#### *4. Electrochemical measurements*

The CHI 760E electrochemical workstation from Shanghai Chenhua was used to analyze the electrochemical properties of the samples. The experiment was conducted using a three-electrode system in which the prepared catalyst was used as the working electrode, the graphite rod was used as the counter electrode, and the Hg/HgO electrode was used as the reference electrode. In this paper, 1 M KOH solution was used as the electrolyte for electrochemical test. In addition, 85% iR-compensation was applied to the working electrode's performance. This compensation helps to account for the ohmic voltage reduction that can occur between the working electrode and the reference electrode. All applied potentials were converted relative to the reversible hydrogen electrode (RHE),  $E_{RHE} = E_{Hg/HgO} + 0.059 \text{ pH} + 0.098 \text{ V}$ . The polarization curves were obtained by linear sweep voltammetry (LSV) at a sweep rate of 5 mV s<sup>-1</sup>. The Tafel equation ( $\eta = b \log |j| + a$ ) was then used to calculate the corresponding

Tafel curves from the polarization curves. The Tafel equation relates the overpotential ( $\eta$ ) to the current density ( $j$ ) and the Tafel slope ( $b$ ). The interface charge transfer resistance was measured using electrochemical impedance spectroscopy (EIS) over a frequency range of 0.01-10<sup>5</sup> Hz. EIS is a technique that measures the impedance of an electrochemical system as a function of frequency. By analyzing the impedance data, it is possible to obtain information about the charge transfer resistance at the electrode-electrolyte interface. The double-layer capacitance ( $C_{dl}$ ) of an electrochemical system, which is related to its electrochemically active surface area (ECSA). Cyclic voltammogram curves were collected at scan rates of 20, 40, 60, 80, and 100 mV/s in the potential range of 0.114-0.214 V vs RHE. The resulting data can be analyzed to determine  $C_{dl}$  and ECSA for the electrochemical system under study.

#### 5 Turnover frequency (TOF)

The  $C_{dl}$  of HER for CoPB@ZIF-67/NF, CoPB/NF and ZIF-67/NF were determined to be 15.76 mF cm<sup>-2</sup>, 10.23 mF cm<sup>-2</sup> and 4.68 mF cm<sup>-2</sup>, respectively (Fig. 3d). We assumed that the total number of surface sites, including cobalt, phosphide, and boron atoms, represented the number of active sites. Then, it is converted into a normalized turnover frequency (TOF) diagram based on current density. The double layer capacitance of the standard electrode (nickel foil) is about 60  $\mu$ F cm<sup>-2</sup> and the number of active sites on the surface is 1.164 $\times$ 10<sup>15</sup>.

CoPB@ZIF-67/NF catalyst:

$$\text{RF CoPB@ZIF-67/NF} = \frac{C_{CoPB@ZIF-67/NF}}{C_{dl \text{ Flat standard}}} = \frac{15.76 \text{ mF cm}^{-2}}{60 \mu\text{F cm}^{-2}} = 262.7$$

The number (N) of surface-active sites per cm<sup>-2</sup> is calculated based on,

$$N_{\text{NFs}} = \text{RF}_{\text{NFs}} \times N_{\text{Flat standard}} = 262.7 \times 1.164 \times 10^{15} = 3.06 \times 10^{17}$$

Then the per-site TOF is calculated by the following equation:

$$\text{TOF per site} = \frac{\text{the number of total hydrogen turn overs}}{\text{the number of surface active sites}}$$

The number of total hydrogen is calculated from the current density using the following equation:

$$\frac{\frac{\text{mA}}{(\text{jcm}^2)}}{\frac{1\text{A}}{(1000\text{ mA})}} \times \frac{\frac{1\text{C/s}}{1\text{A}}}{\frac{1\text{ mol e}^-}{(96485.3\text{ C})}} \times \frac{\frac{1\text{ mol H}_2}{(2\text{ mol e}^-)}}{\frac{6.022 \times 10^{23}\text{ molecules}}{1\text{ mol H}_2}} \times \left( \frac{\text{H}_2/\text{s}}{\text{cm}^2} \right) \frac{\text{mA}}{\text{per cm}^2} = 3.12 \times 10^{15} \frac{\text{H}_2/\text{s}}{\text{cm}^2} \text{ per cm}^2$$

The current density at an overpotential of 100 mV in 1 M KOH is 71.86 mA cm<sup>-2</sup>;

therefore, the TOF per site is calculated as,

$$\frac{(3.12 \times 10^{15} \frac{\text{H}_2/\text{s}}{\text{cm}^2} \text{ per } \frac{\text{mA}}{\text{cm}^2}) (71.86 \frac{\text{mA}}{\text{cm}^2})}{3.06 \times 10^{17}} = 0.733 \frac{\text{H}_2/\text{s}}{\text{surface site}}$$

The TOFs of CoPB/NF and ZIF-67/NF were calculated in the same manner as those of CoPB@ZIF-67/NF electrode methods:

$$\text{CoPB/NF catalyst: TOF} = 0.244 \frac{\text{H}_2/\text{s}}{\text{surface site}}$$

$$\text{ZIF-67/NF catalyst: TOF} = 0.157 \frac{\text{H}_2/\text{s}}{\text{surface site}}$$

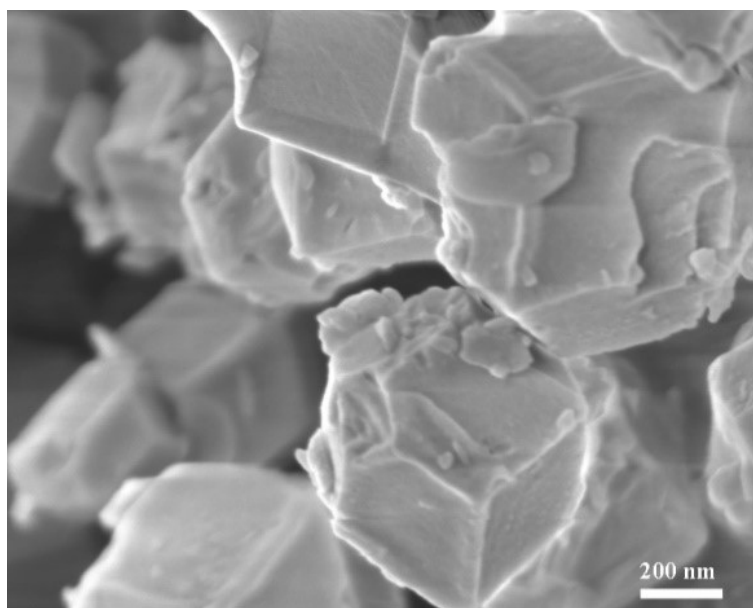

**Fig. S1.** Field-emission scanning electron microscopy (FESEM) images of ZIF-67.

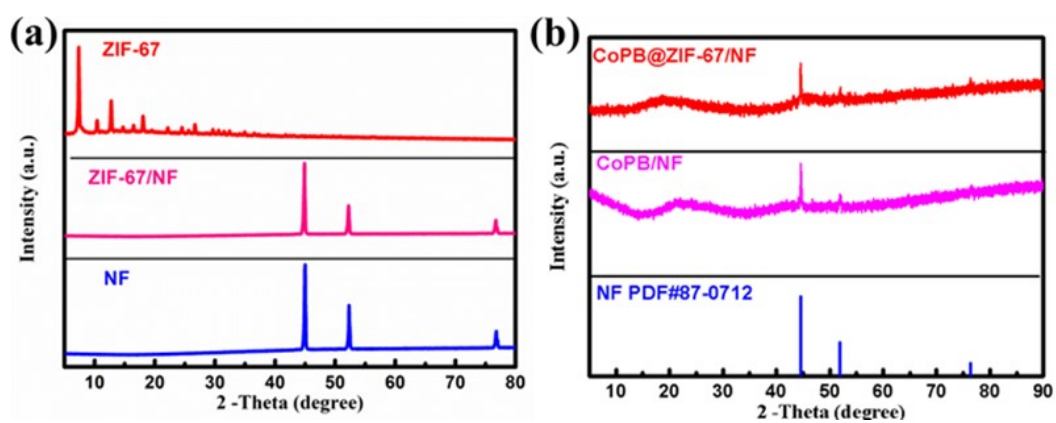

**Fig. S2.** XRD pattern of catalyst (a) NF, ZIF-67 and ZIF-67/NF. (b) CoPB@ZIF-67/NF, CoPB/NF and PDF#87-0712.

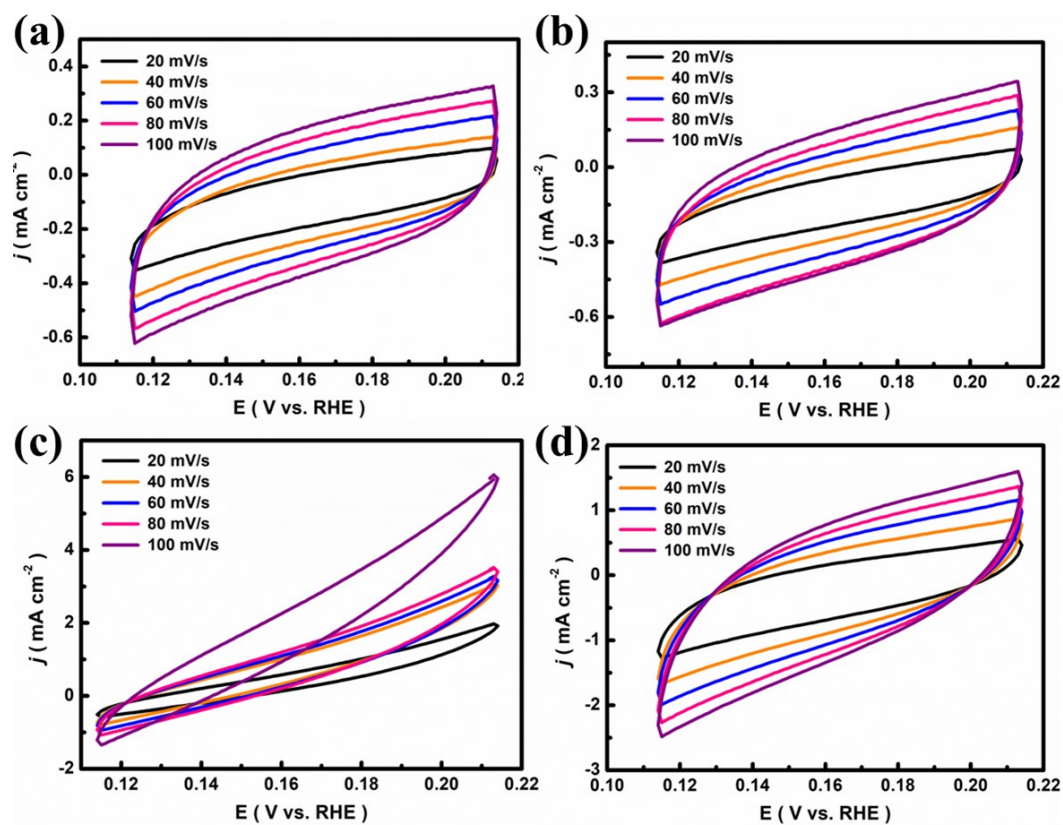

**Fig. S3.** CV curves of (a) Nickel foam, (b) ZIF-67/NF, (c) CoPB/NF, (d) CoPB@ZIF-67/NF at different scan rates (20 to 100  $\text{mV s}^{-1}$ ) for HER.

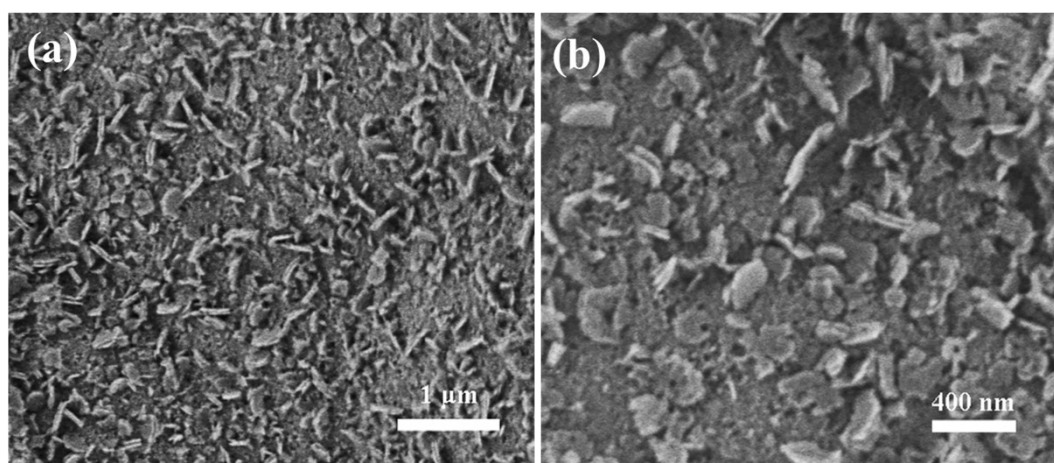

**Fig. S4.** FESEM images of CoPB@ZIF-67/NF after chronopotentiometry test for 100 h at  $10 \text{ mA cm}^{-2}$ .

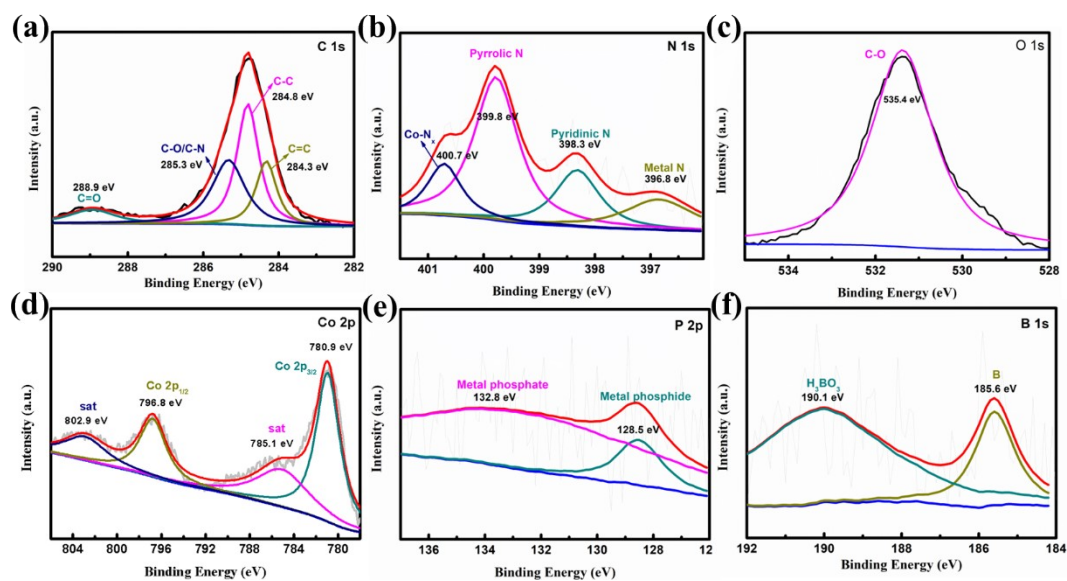

**Fig. S5.** High-resolution XPS spectra of (a) C 1s, (b) N 1s, (c) O 1s, (d) Co 2p, (e) P 2p and (f) B 1s for CoPB@ZIF-67/NF after chronopotentiometry test for 100 h at 10 mA cm<sup>-2</sup>.

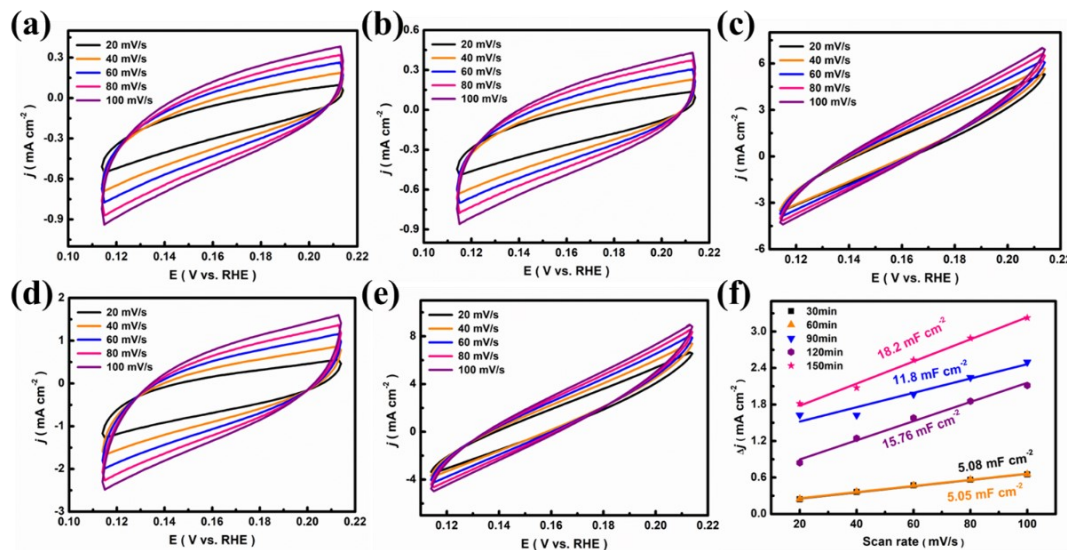

**Fig. S6.** CV curves and  $C_{dl}$  value of CoPB@ZIF-67/NF at different reaction times at different scan rates (20 to 100 mV s<sup>-1</sup>) for HER. (a-e) 30 min, 60 min, 90 min, 120 min, 150 min. (f)  $C_{dl}$  value.



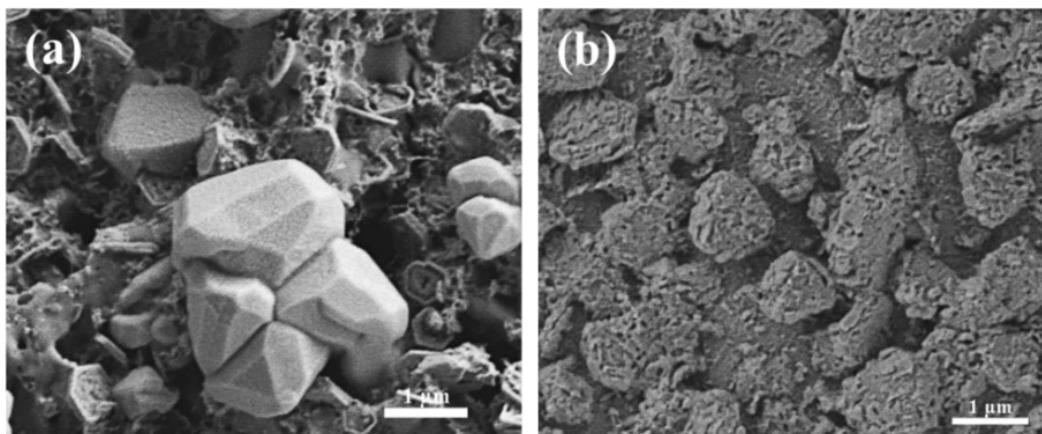

**Fig. S7.** FESEM images of catalyst (a) CoP@ZIF-67/NF, (b) CoB@ZIF-67/NF.

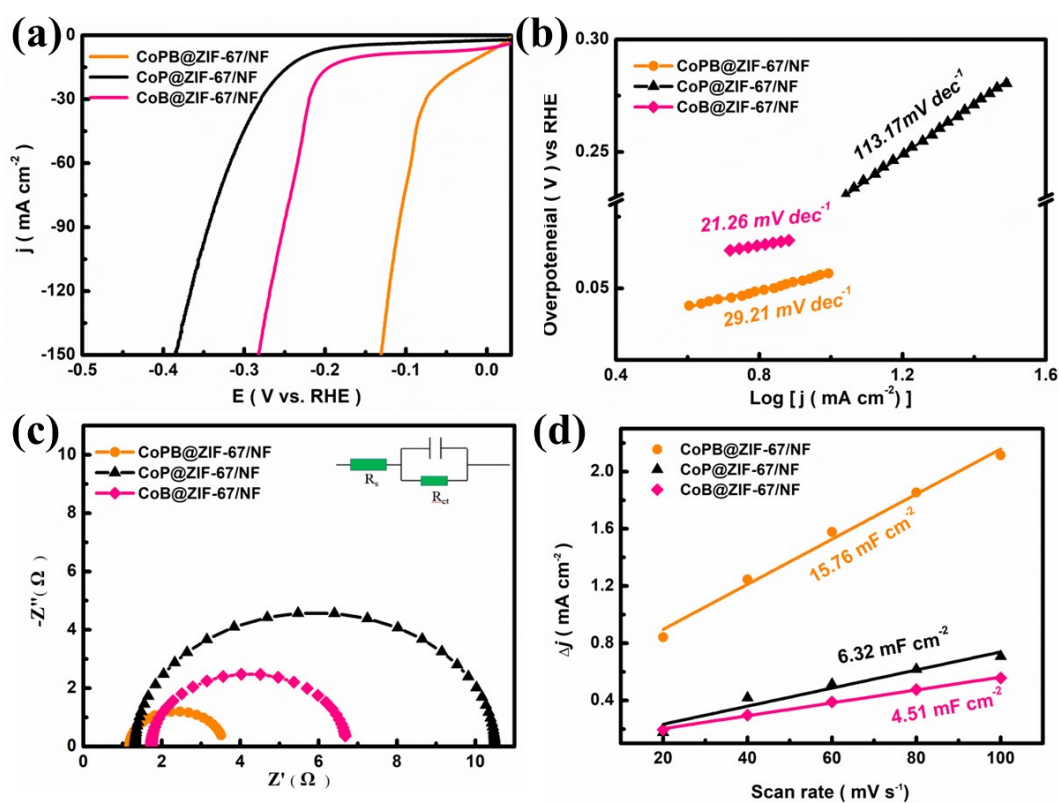

**Fig. S8.** CoPB@ZIF-67/NF, CoP@ZIF-67/NF, CoB/NF and CoPB@ZIF-67/NF (a) iR-corrected LSV polarization curves. (b) Tafel slope plots. (c) Nyquist plots (inset: the fitted circuit diagram). (d)  $C_{dl}$  value.

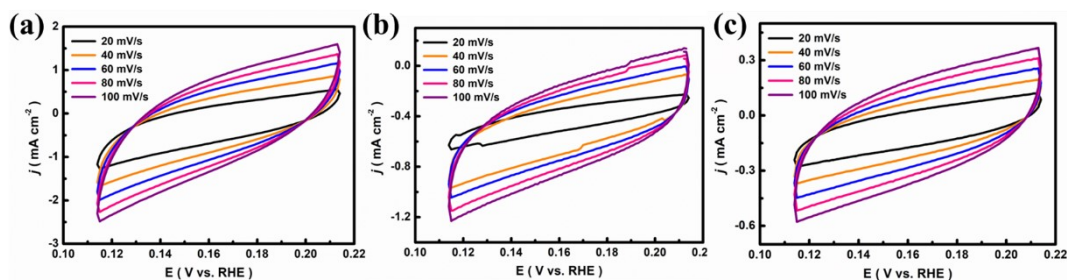

**Fig. S9.** CV curves of (a) CoPB@ZIF-67/NF, (b) CoP@ZIF-67/NF and (c) CoB@ZIF-67/NF at different scan rates (20 to 100  $\text{mV s}^{-1}$ ) for HER.

**Table S1.** ICP-OES results of CoPB@ZIF-67/NF catalyst

| Sample         | Co (wt%) | P (wt%) | B (wt%) |
|----------------|----------|---------|---------|
| CoPB@ZIF-67/NF | 70.3     | 1.07    | 0.18    |

**Table S2.** The performance of different catalysts for HER in 1 M KOH

| catalysts      | $\eta_{10}$ (mV) | $\eta_{50}$ (mV) | $\eta_{100}$ (mV) | Tafel plot (mV $\text{dec}^{-1}$ ) |
|----------------|------------------|------------------|-------------------|------------------------------------|
| NF             | 244              | 332              | 385               | 117.17                             |
| Pt-C/NF        | 26               | 86               | 127               | 79.72                              |
| ZIF-67/NF      | 204              | 310              | 351               | 131.02                             |
| CoPB/NF        | 66               | 175              | 226               | 53.36                              |
| CoPB@ZIF-67/NF | 9                | 90               | 114               | 29.21                              |
| CoP@ZIF-67/NF  | 227              | 306              | 352               | 113.17                             |
| CoB@ZIF-67/NF  | 155              | 229              | 257               | 21.26                              |

Note:  $\eta_{10}$  is the overpotential at a current density of 10  $\text{mA cm}^{-2}$ ,  $\eta_{50}$  is the overpotential at a current density of 50  $\text{mA cm}^{-2}$ ,  $\eta_{100}$  is the overpotential at a current density of 100  $\text{mA cm}^{-2}$

**Table S3.** Comparison of hydrogen evolution performance of heterogeneous catalysts

| Catalysts                                                                | Electrolyte | $j = 10 \text{ mA cm}^{-2}$ |                                    | Ref       |
|--------------------------------------------------------------------------|-------------|-----------------------------|------------------------------------|-----------|
|                                                                          |             | Overpotential (mV)          | Tafel plot (mV $\text{dec}^{-1}$ ) |           |
| CoPB@ZIF-67/NF                                                           | 1 M KOH     | 9                           | 29.21                              | This work |
| Co <sub>2</sub> P/Co <sub>4</sub> N                                      | 1 M KOH     | 40                          | 56                                 | 1         |
| MoS <sub>2</sub> -MoP/C                                                  | 1 M KOH     | 102                         | 58                                 | 2         |
| Co-MoC/Mo <sub>2</sub> C-0.5                                             | 1 M KOH     | 82                          | 54                                 | 3         |
| Ni/NiFe-LDO/NF                                                           | 1 M KOH     | 29                          | 82                                 | 4         |
| MoS <sub>2</sub> -MoO <sub>3-x</sub> /Ni <sub>3</sub> S <sub>2</sub> @NF | 1 M KOH     | 76                          | 53.2                               | 5         |
| RuO <sub>2</sub> /RuP <sub>2</sub> /Ru                                   | 1 M KOH     | 33                          | 36.7                               | 6         |

|                                                         |         |      |       |      |
|---------------------------------------------------------|---------|------|-------|------|
| W-NiS <sub>2</sub> /MoO <sub>2</sub> @CC                | 1 M KOH | 52   | 49    | 7    |
| Co <sub>2</sub> N <sub>0.67</sub> /MoO <sub>2</sub> /MF | 1 M KOH | 75.2 | 150.3 | 8    |
| Ni <sub>3</sub> P-Ni/CNT                                | 1 M KOH | 116  | 59    | 9    |
| CoP-MoO <sub>2</sub> /MF                                | 1 M KOH | 42   | 127   | 10   |
| Mo <sub>2</sub> N/Mo <sub>2</sub> C                     | 1 M KOH | 88.1 | 68.5  | 11   |
| Fe-Co-P/NF                                              | 1 M KOH | 87   | 63    | 12   |
| Zn-VO <sub>x</sub> -Co                                  | 1 M KOH | 46   | 75    | 13   |
| Au/Ni <sub>3</sub> S <sub>2</sub> /NF                   | 1 M KOH | 97   | 72    | 14   |
| Ni <sub>2</sub> P@MoS <sub>2</sub> /CC                  | 1 M KOH | 99   | 97    | [15] |

**Table S4.** Consists of elements of CoPB@ZIF-67/NF determined by XPS before and after stability test

| Sample                | C (at%) | N (at%) | O (at%) | Co (at%) | P (at%) | B (at%) |
|-----------------------|---------|---------|---------|----------|---------|---------|
| Before stability test | 51.47   | 3.91    | 24.5    | 6.19     | 1.54    | 12.4    |
| After stability test  | 42.64   | 2.93    | 34.31   | 10.38    | 2.58    | 7.16    |

## References

- 1 Y. Men, S. Jia, P. Li, Y. Tan, J. Wang, P. Zhao, G. Cheng, S. Chen, W. Luo, Boosting alkaline hydrogen evolution electrocatalysis through electronic communicating vessels on Co<sub>2</sub>P/Co<sub>4</sub>N heterostructure catalyst, *Chem. Eng. J.*, 2022, **433**, 133831.
- 2 Z. Wu, J. Wang, K. Xia, W. Lei, X. Liu, D. Wang, MoS<sub>2</sub>-MoP heterostructured nanosheets on polymer-derived carbon as an electrocatalyst for hydrogen evolution reaction, *J. Mater. Chem. A*, 2018, **6**, 616-622.
- 3 J. Li, R. Ge, P. Lan, J. Yang, J. Feng, Y. Li, S. Li, B. Liu, W. Li, In situ phase transition induced TM-MoC/Mo<sub>2</sub>C (TM= Fe, Co, Ni, and Cu) heterostructure catalysts for efficient hydrogen evolution, *J. Mater. Chem. A*, 2022, **10**, 10493-10502.

- 4 Y. Tian, A. Huang, Z. Wang, M. Wang, Q. Wu, Y. Shen, Q. Zhu, Y. Fu, M. Wen, Two-dimensional hetero-nanostructured electrocatalyst of Ni/NiFe-layered double oxide for highly efficient hydrogen evolution reaction in alkaline medium, *Chem. Eng. J.*, 2021, **426**, 131827.
- 5 M. Luo, S. Liu, W. Zhu, G. Ye, J. Wang, Z. He, An electrodeposited MoS<sub>2</sub>-MoO<sub>3-x</sub>/Ni<sub>3</sub>S<sub>2</sub> heterostructure electrocatalyst for efficient alkaline hydrogen evolution, *Chem. Eng. J.*, 2022, **428**, 131055.
- 6 Y. Zhao, X. Zhang, Y. Gao, Z. Chen, Z. Li, T. Ma, Z. Wu, L. Wang, S. Feng, Heterostructure of RuO<sub>2</sub>-RuP<sub>2</sub>/Ru Derived from HMT-based Coordination Polymers as Superior pH-Universal Electrocatalyst for Hydrogen Evolution Reaction, *Small*, 2022, **18**, 2105168.
- 7 S. Ligani Fereja, P. Li, Z. Zhang, J. Guo, Z. Fang, Z. Li, S. He, W. Chen, W-doping induced abundant active sites in a 3D NiS<sub>2</sub>/MoO<sub>2</sub> heterostructure as an efficient electrocatalyst for urea oxidation and hydrogen evolution reaction, *Chem. Eng. J.*, 2022, **432**, 134274.
- 8 R. Tong, M. Xu, H. Huang, C. Zhang, Y. Ma, X. Wang, X. Hu, Y. Qu, S. Wang, H. Pan, Co<sub>2</sub>N<sub>0.67</sub>/MoO<sub>2</sub> Heterostructure as High-Efficiency Electrocatalysts for the Hydrogen Evolution Reaction, *ACS Appl. Energy Mater.*, 2022, **5**, 440-448.
- 9 D. Li, Z.-F. Zhang, Z.-Y. Yang, W.-Y. Wu, M.-H. Zhang, T.-R. Yang, Q.-S. Zhang, J.-Y. Xie, Ni<sub>3</sub>P-Ni heterostructure electrocatalyst for alkaline hydrogen evolution, *J. Alloys Compd.*, 2022, **921**, 166204.
- 10 H. Zhao, Z. Li, X. Dai, M. Cui, F. Nie, X. Zhang, Z. Ren, Z. Yang, Y. Gan, X.

- Yin, Y. Wang, W. Song, Heterostructured CoP/MoO<sub>2</sub> on Mo foil as high-efficiency electrocatalysts for the hydrogen evolution reaction in both acidic and alkaline media, *J. Mater. Chem. A*, 2020, **8**, 6732-6739.
- 11 B. Zhang, H. Xu, Q. Chen, H. Chen, G. He, ZIF-67 derived Mo<sub>2</sub>N/Mo<sub>2</sub>C heterostructure as high-efficiency electrocatalyst for hydrogen evolution reaction, *J. Alloys Compd.*, 2022, **922**, 166216.
- 12 H. Xu, J. Zhu, P. Wang, D. Chen, C. Zhang, M. Xiao, Q. Ma, H. Bai, R. Qin, J. Ma, S. Mu, Fe–Co–P multi-heterostructure arrays for efficient electrocatalytic water splitting, *J. Mater. Chem. A*, 2021, **9**, 24677-24685.
- 13 M. Chen, J. Liu, N. Kitiphatpiboon, X. Li, J. Wang, X. Hao, A. Abudula, Y. Ma, G. Guan, Zn-VO<sub>x</sub>-Co nanosheets with amorphous/crystalline heterostructure for highly efficient hydrogen evolution reaction, *Chem. Eng. J.*, 2022, **432**, 134329.
- 14 H. Liu, J. Cheng, W. He, Y. Li, J. Mao, X. Zheng, C. Chen, C. Cui, Q. Hao, Interfacial electronic modulation of Ni<sub>3</sub>S<sub>2</sub> nanosheet arrays decorated with Au nanoparticles boosts overall water splitting, *Appl. Catal. B Environ.*, 2022, **304**, 120935.
- 15 Y. Dai, W. Chen, B. Guo, X. Li, J. Guan, L. Wang, M. Zhang, Ni<sub>2</sub>P@MoS<sub>2</sub>/CC catalysts with heterogeneous structure are used for highly efficient electrolysis of water for hydrogen evolution, *J. Mater. Chem. A*, 2022, **905**, 164157.
